# Supplementary material for: Regulating TiO2/MXenes catalysts to promote photocatalytic performance of highly selective oxidation of d-xylose
Source: Royal Society of Chemistry journal article supplement (doi:10.1039/d0gc03628e), 2020-12-28
Supplement: d0gc03628e1.pdf [file d0gc03628e1.pdf]

**Supporting Information for**  
**Regulating TiO<sub>2</sub>/MXenes Catalysts to Promote Photocatalytic**  
**Performance of Highly Selective Oxidation of D-Xylose**

Liang Chen,<sup>#a</sup> Yiming Huang,<sup>#a</sup> Ren Zou,<sup>a</sup> Jiliang Ma,<sup>a</sup> Yunyi Yang,<sup>a</sup> Tingzhen Li,<sup>a</sup>  
Mingsai Li,<sup>a</sup> Qi Hao,<sup>a</sup> Haibo Xie,<sup>b</sup> Xinwen Peng,<sup>\*a</sup>

<sup>a</sup> State Key Laboratory of Pulp and Paper Engineering, South China University of Technology, Guangzhou, China. 510641.

<sup>b</sup> College Materials & Metallurgy, Guizhou University, West Campus, Guiyang, China. 550025.

\*Corresponding authors' E-mail: fexwpeng@scut.edu.cn (Xinwen Peng),

## Reaction device diagram

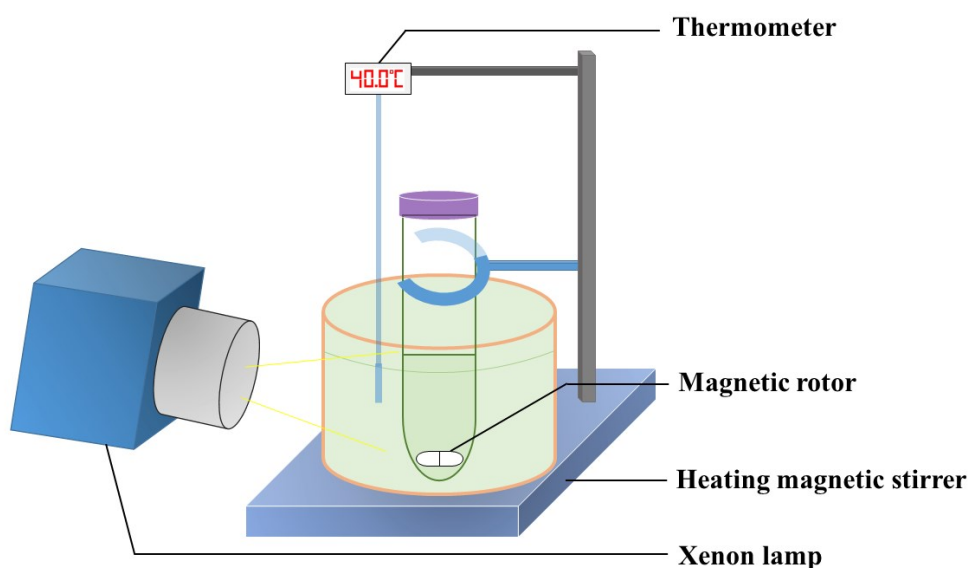

## Schematic diagram of catalyst preparation process

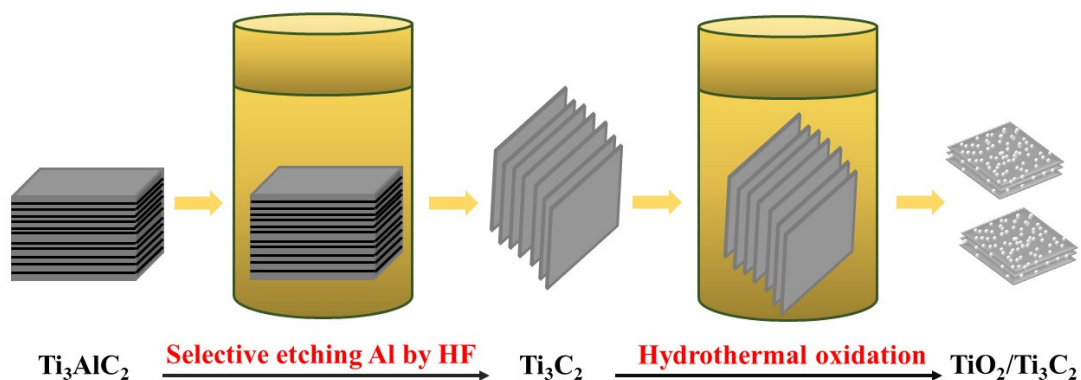

## Cycle Experiment

The photocatalyst TT-12 after the reaction was recycled by washing, filtration, drying, grind. The recycled TT-12 was then used to repeat the previous reaction under the optimal conditions. The above operations were repeated four times to test the yield of xylonic acid and the conversion of xylose.

## Product detection

All the samples were immediately syringed out, filtered and analyzed by high-performance liquid chromatography (HPLC, Agilent 1260 series) with a UV detector at 210 nm and a Bio-Rad Aminex HPX-87H column (300 mm × 7.8 mm × 9 μm). 5 mM H<sub>2</sub>SO<sub>4</sub> was used as the mobile phase at 55 °C with a flow rate of 0.6 mL min<sup>-1</sup>. Xylose was quantified using a High Performance Ion Chromatography (HPIC, Dionex ICS-3000) system with an integrated amperometric detector and a CarboPac PA1 column at 30 °C using pure water as eluent. The concentrations of the products were determined by comparing the calibration curve established with the external standards. The conversion of xylose and the yields of the products (D-xylonic acid, lactic acid, acetic acid and formic acid) were calculated by the following equations:

$$\begin{aligned} \text{Conversion (\%)} \\ &= \frac{\text{Moles of carbon in feedstock consumed}}{\text{Moles of carbon in feedstock input}} \times 100\% \end{aligned}$$

$$\text{Product yield (\%)} = \frac{\text{Moles of carbon in organic acid}}{\text{Moles of carbon in feedstock input}} \times 100\%$$

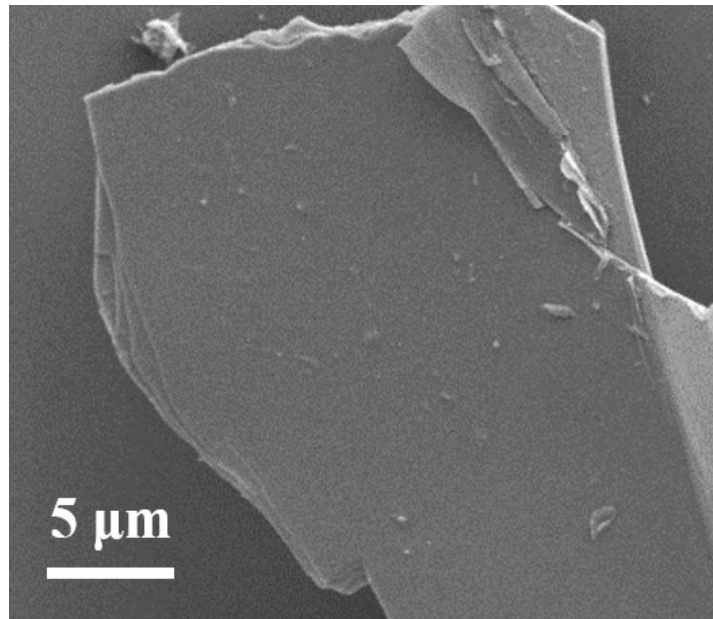

**Fig. S1** The SEM image of Ti<sub>3</sub>C<sub>2</sub>

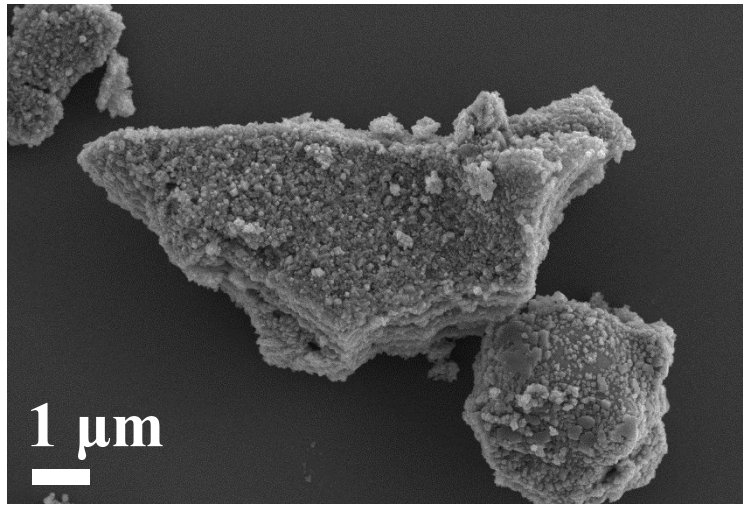

**Fig. S2** The SEM image of TiO<sub>2</sub>/Ti<sub>3</sub>C<sub>2</sub>

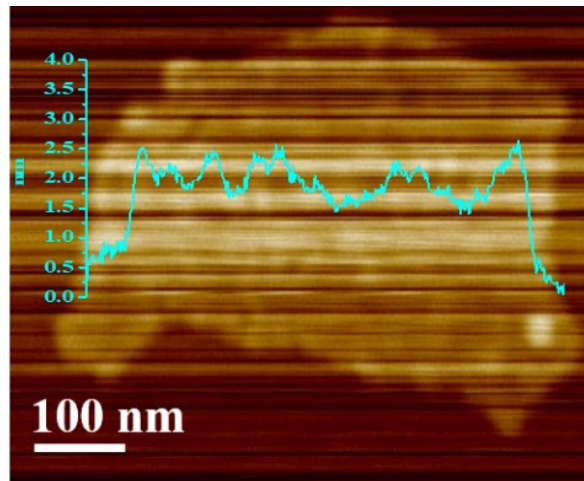

**Fig. S3** AFM image of composite photocatalysts  $\text{TiO}_2/\text{Ti}_3\text{C}_2$

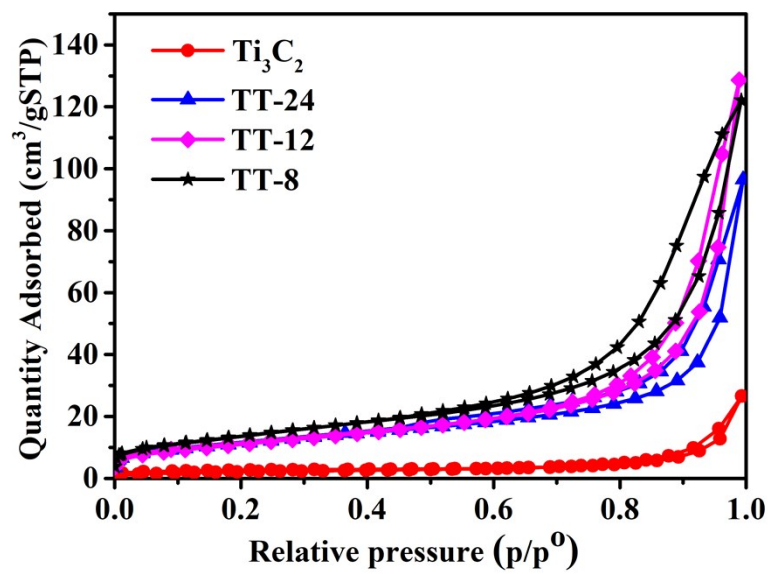

Fig. S4 N<sub>2</sub> adsorption-desorption isotherms of Ti<sub>3</sub>C<sub>2</sub>, TT-8, TT-12 and TT-24

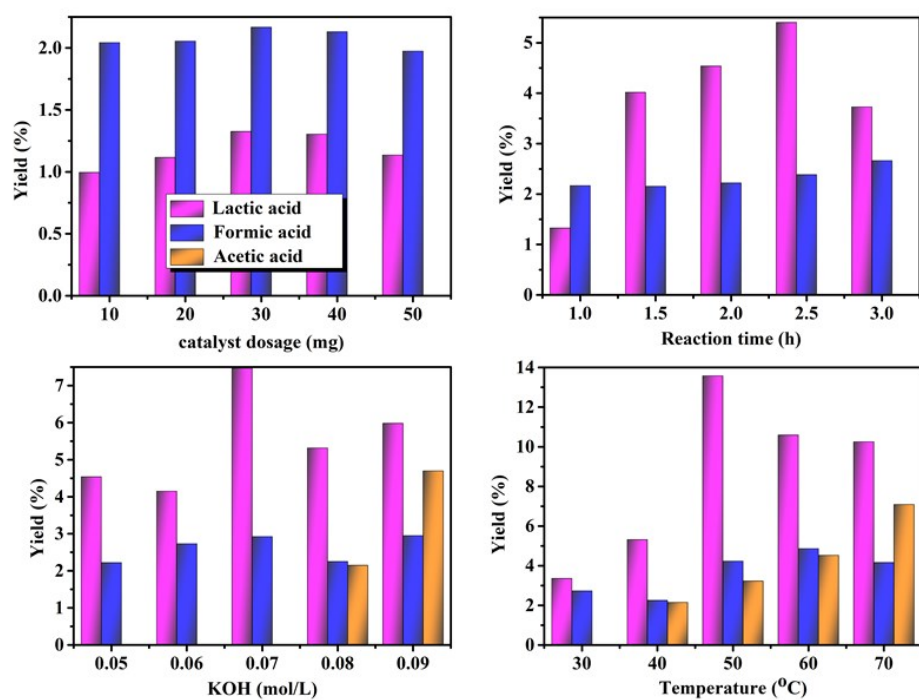

**Fig. S5** The yield of byproducts under different reaction conditions



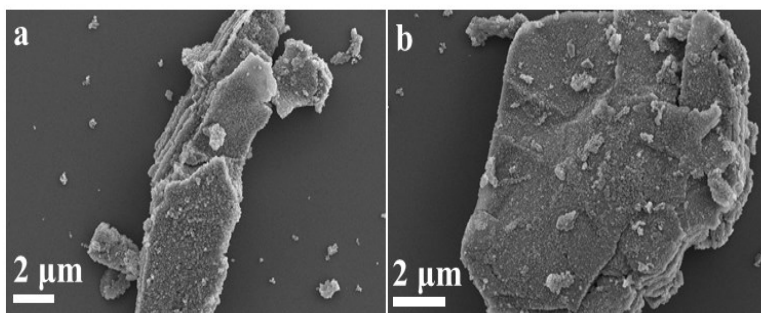

**Fig. S6** The SEM images of recycled TT-12

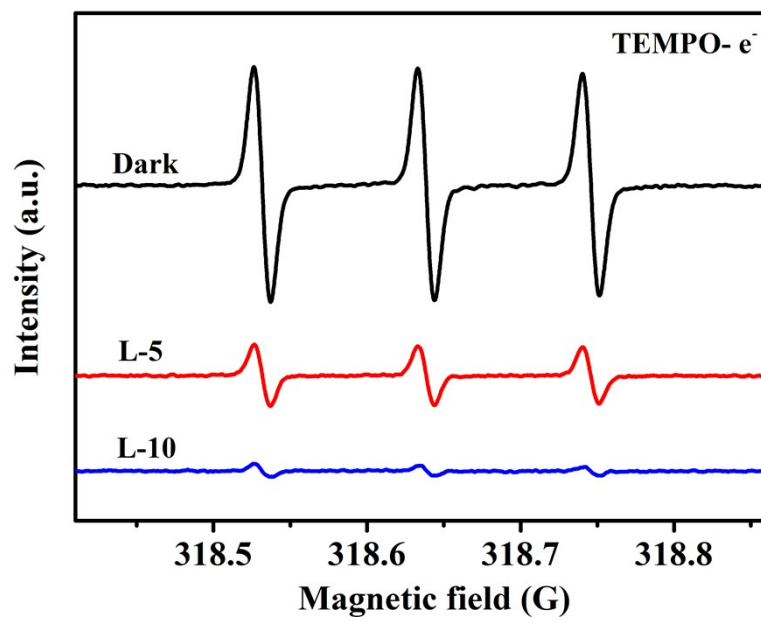

**Fig. S7** TEMPO ESR spin-labelling for  $e^-$

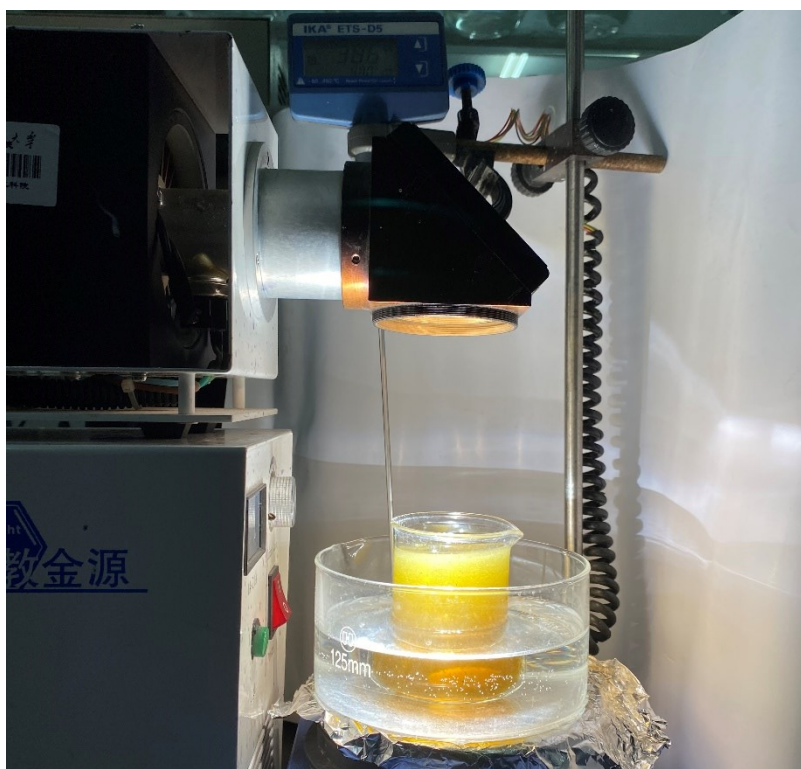

**Fig. S8** A hundred-fold scale-up experiment

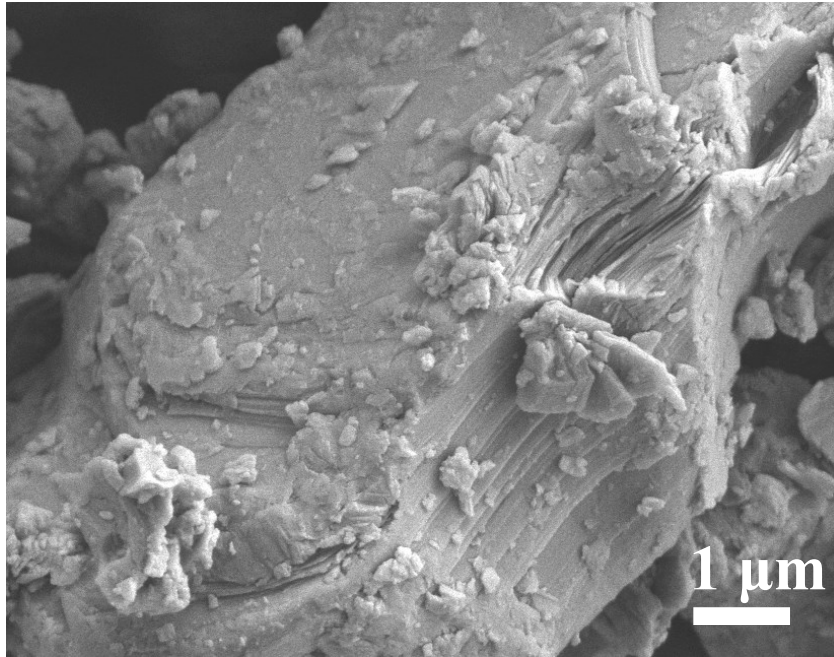

**Fig. S9** The SEM image of Ti<sub>3</sub>AlC<sub>2</sub>

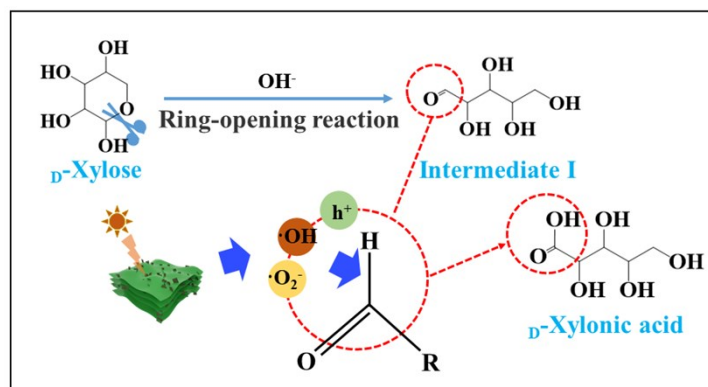

**Fig. S10** Schematic diagram of primary reaction mechanism

**Table S1** BET Surface Area of different samples.

| Sample Number | Sample Name                    | BET Surface Area (m <sup>2</sup> /g) |
|---------------|--------------------------------|--------------------------------------|
| 1             | Ti <sub>3</sub> C <sub>2</sub> | 8.7370                               |
| 2             | TT-8                           | 50.3050                              |
| 3             | TT-12                          | 47.5700                              |
| 4             | TT-24                          | 42.0429                              |

**Table S2** Photocatalytic properties of different samples.

| Sample Number | Sample Name                    | Xylonic acid Yield |
|---------------|--------------------------------|--------------------|
| 1             | Ti <sub>3</sub> C <sub>2</sub> | trace              |
| 2             | TiO <sub>2</sub>               | 13.2%              |
| 3             | TT-8                           | 33.3%              |
| 4             | TT-12                          | 35.1%              |
| 5             | TT-24                          | 29.7%              |

Notes: Reaction conditions: sample, 10 mg; xylose, 100mg; 0.05 mol/L KOH, 10 mL; reaction temperature, 40 °C; reaction time, 1 h; light source, xenon lamp.

**Table S3** Elemental content of different samples measured by EPMA (Electron Probe Micro-analyzer).

| Samples                            | Element (at%) |       |       |      |      |
|------------------------------------|---------------|-------|-------|------|------|
|                                    | Ti            | C     | O     | F    | Al   |
| <b>Ti<sub>3</sub>C<sub>2</sub></b> | 47.61         | 29.63 | 13.98 | 8.15 | 0.64 |
| <b>TT-8</b>                        | 43.33         | 29.54 | 24.53 | 2.26 | 0.34 |
| <b>TT-12</b>                       | 43.12         | 25.46 | 29.69 | 2.23 | 0.51 |
| <b>TT-24</b>                       | 42.55         | 20.88 | 34.74 | 1.40 | 0.43 |



**Table S4** Elemental content of different samples measured by EPMA.

| Samples                            | Element (wt%) |       |       |      |      |
|------------------------------------|---------------|-------|-------|------|------|
|                                    | Ti            | C     | O     | F    | Al   |
| <b>Ti<sub>3</sub>C<sub>2</sub></b> | 75.22         | 11.74 | 7.38  | 5.10 | 0.57 |
| <b>TT-8</b>                        | 72.19         | 12.34 | 13.65 | 1.49 | 0.32 |
| <b>TT-12</b>                       | 71.28         | 9.42  | 17.47 | 1.38 | 0.45 |
| <b>TT-24</b>                       | 71.09         | 7.44  | 20.14 | 0.93 | 0.40 |

**Table S5** The mole fraction of each compound (TiO<sub>2</sub>, Ti<sub>3</sub>C<sub>2</sub>O and C).

| Samples                            | Component content (%) |                                  |       |
|------------------------------------|-----------------------|----------------------------------|-------|
|                                    | TiO <sub>2</sub>      | Ti <sub>3</sub> C <sub>2</sub> O | C     |
| <b>Ti<sub>3</sub>C<sub>2</sub></b> | -                     | 100                              | -     |
| <b>TT-8</b>                        | 26.09                 | 53.91                            | 20.00 |
| <b>TT-12</b>                       | 39.37                 | 48.46                            | 12.17 |
| <b>TT-24</b>                       | 52.79                 | 40.74                            | 6.47  |

The content of TiO<sub>2</sub> in samples with different hydrothermal time are determined by EPMA analysis, as shown in Table S2, S3 and S4. The Ti: C: O atomic ratio of the Ti<sub>3</sub>C<sub>2</sub> are 47.61: 29.63: 13.98. Hence, The O content in Mxenes is determined, and the chemical formula is Ti<sub>3</sub>C<sub>2</sub>O. During the hydrothermal process, the Ti<sub>3</sub>C<sub>2</sub>O is consumed and transformed to TiO<sub>2</sub> and C. Based on the balances of Ti, O and C atoms, the contents of Ti<sub>3</sub>C<sub>2</sub>O, TiO<sub>2</sub> and C can be calculated according to EPMA results (Table S4).

**Table S6** Photocatalytic properties of different experiments.

| Number | Xylonic acid Yield |
|--------|--------------------|
| 1      | trace              |
| 2      | trace              |
| 3      | trace              |
| 4      | 55.43%             |

Notes: 1: No catalyst in the best reaction condition; 2: No light in the best reaction condition; 3: No O<sub>2</sub> in the best reaction condition; 4: A hundred-fold scale-up experiment in the best reaction condition.
